# Supplementary material for: Magnetic Particle Plug-Based Assays for Biomarker Analysis
Source: MDPI journal article supplement (doi:10.3390/mi7050077), 2016-04-26
Supplement: s1 [file s1]

# Supplementary Material: Magnetic Particle Plug-Based Assays for Biomarker Analysis

Chayakom Phurimsak, Mark D. Tarn and Nicole Pamme

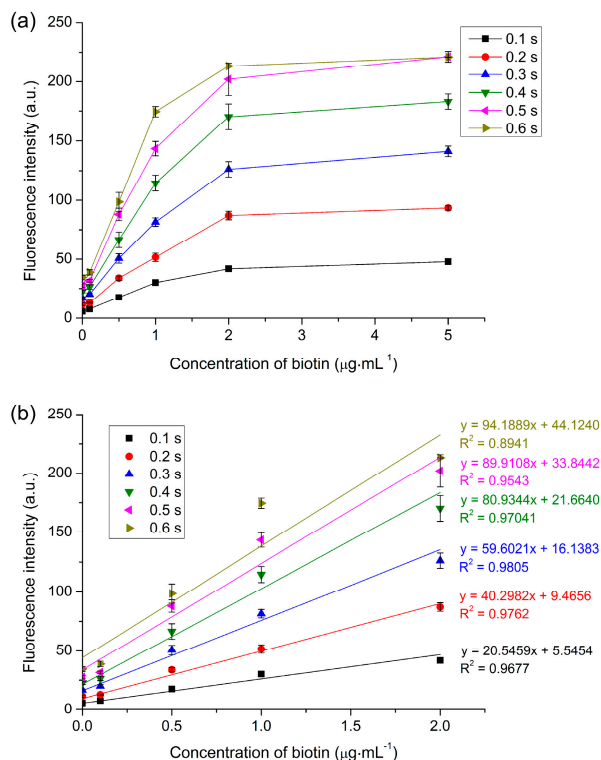

**Figure S1.** Optimisation of CCD camera exposure time. The fluorescence intensity of streptavidin functionalised particle plugs is plotted against the concentration of fluorescently labelled biotin at different CCD exposure times (0.1–0.6 s): (a) biotin concentrations of 0.1–5  $\mu\text{g}\cdot\text{mL}^{-1}$ , demonstrating a typical dose-response curve; and (b) linear range plotted for 0.1–2  $\mu\text{g}\cdot\text{mL}^{-1}$  biotin concentration.

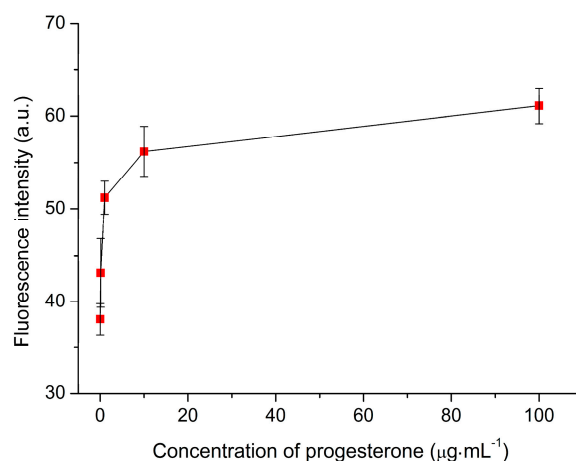

**Figure S2.** Fluorescently labelled progesterone (P4-FITC) assay. Magnetic particles functionalised with anti-P4 were exposed to different concentrations of P4-FITC and the resultant fluorescence intensities were measured. The plot follows a typical dose-response curve.
